# Supplementary material
Source: Springer Nature journal article supplement (https://www.springermedizin.de/resource/supplementary/13098_2013_268_MOESM2_ESM.pdf/9670864)

**A**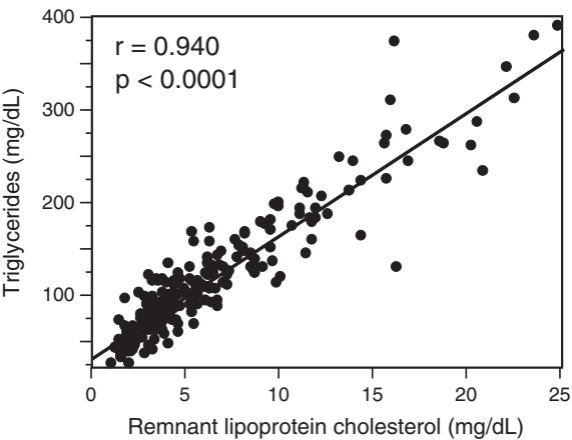**B**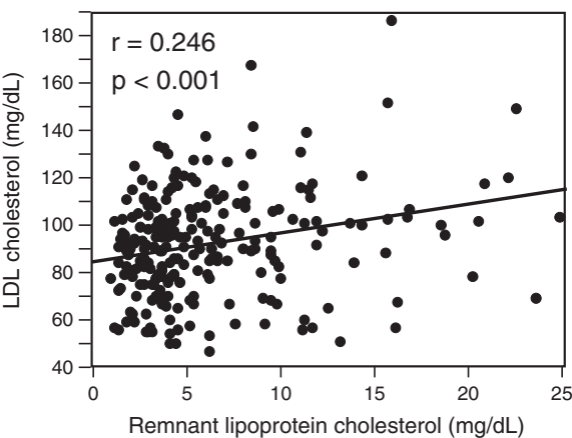**C**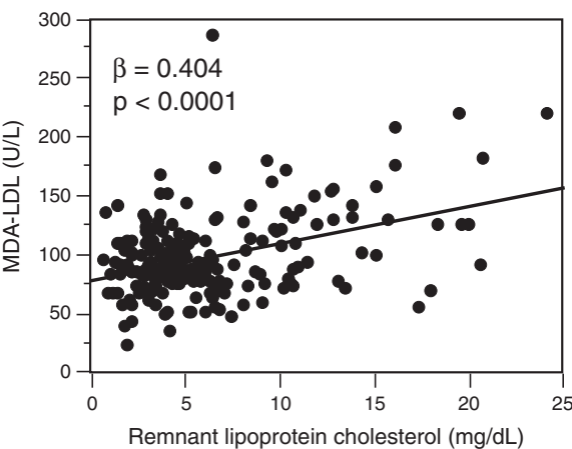

Supplement: MOESM2 [file 9670864]
